# Supplementary material for: Cucumber Fruit Size and Shape Variations Explored from the Aspects of Morphology, Histology, and Endogenous Hormones
Source: Plants (Basel). 2020 Jun 19;9(6):772. doi: 10.3390/plants9060772 (PMC7356835; doi:10.3390/plants9060772)
Supplement: Supplementary file 1 [file plants-09-00772-s001.xlsx]

## Sheet: Table S1
Table S1. Fruit size and shape differences of nine typical cucumber inbred lines at the mature stage (30 DAA).
Traits	Differences in 9 Cucumber Inbred Lines
Fruit length	WI7237 >> WI7123 > NZ1 > 9930 >> WI7204 >> Gy14 >> WI7200 > WI7120 > True Lemon
Fruit diameter	True Lemon ≈ Gy14 > WI7120 > WI7204 > NZ1 > 9930 > WI7123 > WI7200 > WI7237
Fruit shape index	WI7237 >> WI7123 >> NZ1 > 9930 >> WI7204 >> Gy14 > WI7200 >> WI7120 > True Lemon
Seed cavity diameter	True Lemon > Gy14 > WI7120 > WI7204 > NZ1 > 9930 ≈ WI7123 > WI7200 > WI7237
>>, Significant difference between the two varieties; P < 0.05, Tukey’s test.

## Sheet: Table S2
Table S2. Selected reaction monitoring conditions for protonated or deprotonated plant hormones.
PH	SM	Q1	Q3	Q2(V)	DP(V)	RT
IAA	+	176.1	130	20	138	10.37
tZR	+	352	136	41	40	9.22
ZT	+	220	136	25	80	8.74
GA3	−	345	239	−20	−70	9.79
ABA	−	263.1	203.9	−26	−60	10.6
JA	−	209.1	58.9	−16	−60	11.05
IAA, indole-3-acetic acid; tZR, trans-zeatin riboside; ZT, zeatin; GA3, gibberellic acid; ABA, abscisic acid; JA, jasmonic acid; PH, plant hormones; SM, scan mode; Q1, precursor ion selected in Q1; Q3, product ion selected in Q3; Q2, collision energy (V); DP, declustering potential (V); RT, retention time. Retention times listed in this table are obtained under HPLC and column conditions mentione…

## Sheet: Table S3
Table S3. Reverse-phase HPLC gradient parameters.
Time (min)	Gradient (percentage of B by volume)
0–1	25
1–5	Increase linearly to 95
5–6.5	95
6.5–13	Decrease linearly to 25
HPLC, high-performance liquid chromatography;
Reverse-phase column, InertSustain, AQ-C18 5 μm, 4.6 × 250 mm; 40 °C;
Injection volume, 5.00 µL; Flow, 0.6 mL/min;
Mobile phase A, distilled water with 0.1% formic acid; mobile phase B, methanol.
